# Supplementary material
Source: MDPI journal article supplement (https://www.mdpi.com/2071-1050/11/4/1011)
Supplement: s1 [file s1]

Supplementary information

# Restoration of long-term monoculture degraded tea orchard by green and goat manures applications system

Yuhang Jiang<sup>1, 2, 3\*</sup>, Yasir Arafat<sup>1, 2, 3\*</sup>, Puleng Letuma<sup>2, 3</sup>, Liaqat Ali<sup>1</sup>, Muhammad Tayyab<sup>2</sup>, Muhammad Waqas,<sup>2, 3</sup>, Yanchun Li<sup>1, 2, 3</sup>, Weiwei Lin<sup>1, 2, 3</sup>, Sheng Lin<sup>1, 2, 3\*\*</sup>, Wenxiong Lin<sup>1, 2, 3\*\*</sup>

<sup>1</sup>College of life Science, Fujian Agriculture and Forestry University, Fuzhou 35002, China

<sup>2</sup>Key Laboratory of Fujian Province for Agroecological process and safety monitoring, Fujian Agriculture and Forestry University, Fuzhou 35002, China

<sup>3</sup>Institutes of Agroecology, Fujian Agriculture and Forestry University, Fuzhou 35002, China

\*These authors contributed equally to this work

\*\*Corresponding authors, e-mail: [lwxfafu.edu.cn](mailto:lwxfafu.edu.cn) and [lsjk1958@163.com](mailto:lsjk1958@163.com)

Table S1. Nutrient content in the green manure (Leguminous crops) and goat manure

| Treatments      | TN (g·kg <sup>-1</sup> ) | TP (g·kg <sup>-1</sup> ) | TK (g·kg <sup>-1</sup> ) |
|-----------------|--------------------------|--------------------------|--------------------------|
| Egyptian clover | 20.2±2.34 <sup>e</sup>   | 2.46±0.07 <sup>f</sup>   | 6.34±0.03 <sup>b</sup>   |
| Winter Pea      | 25.24±0.91 <sup>d</sup>  | 2.83±0.09 <sup>e</sup>   | 5.8±0.07 <sup>c</sup>    |
| Hairy Vetch     | 28.19±0.17 <sup>c</sup>  | 4.82±0.06 <sup>b</sup>   | 8.62±0.09 <sup>a</sup>   |
| Alfalfa         | 29.59±1.05 <sup>b</sup>  | 3.57±0.11 <sup>d</sup>   | 5.79±0.03 <sup>c</sup>   |
| Laredo Soybean  | 31.21±0.28 <sup>a</sup>  | 5.4±0.04 <sup>a</sup>    | 5.48±0.08 <sup>c</sup>   |

Note: TN, TP, TK, represents total Nitrogen, total Phosphorus and total Potassium respectively. The data mean ± standard deviation, and different letters in same columns show significant difference determined by Tukey's test ( $P \leq 0.05$  n=4).

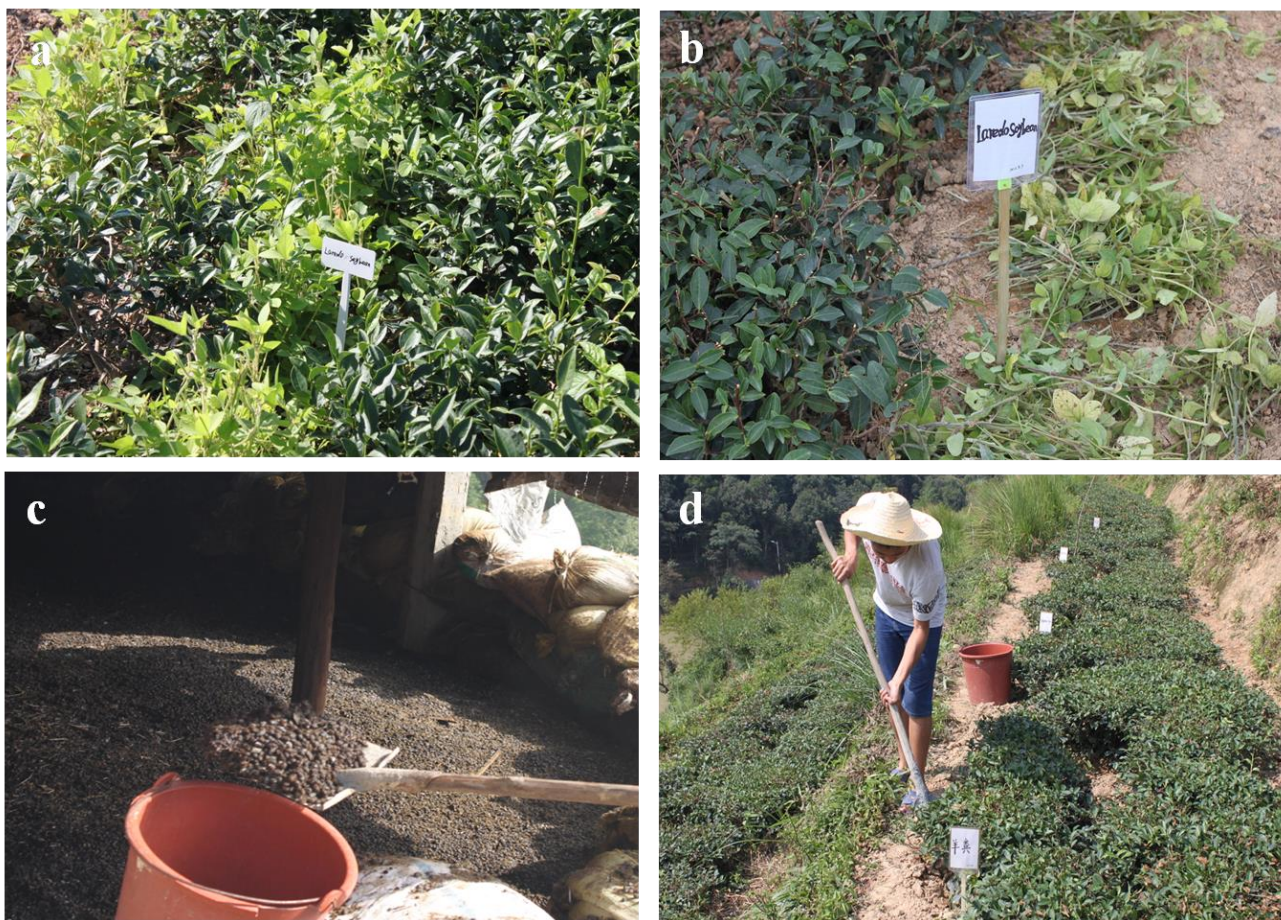

**Figure S1. Green and goat manure application system:** (a) intercropping of Laredo soya bean with tea plantation (b) green manure application to tea orchard (c) goat manure (d) goat manure application to tea orchard

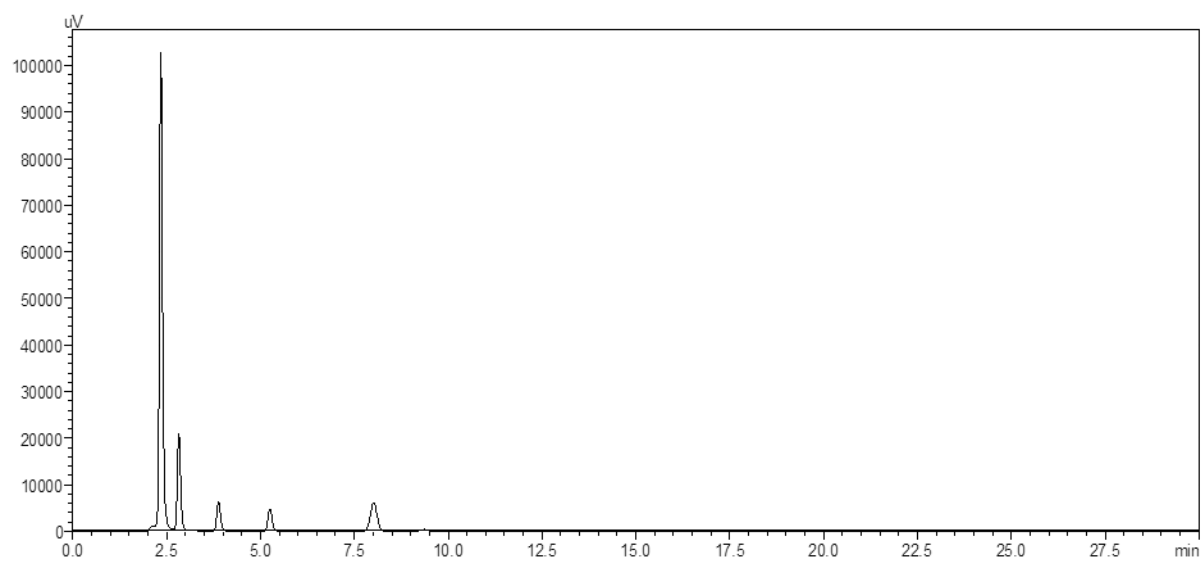

**Figure S2. Five low molecular organic acid chromatograms (from left to right are: oxalic acid, tartaric acid, malic acid, acetic acid, citric acid)**

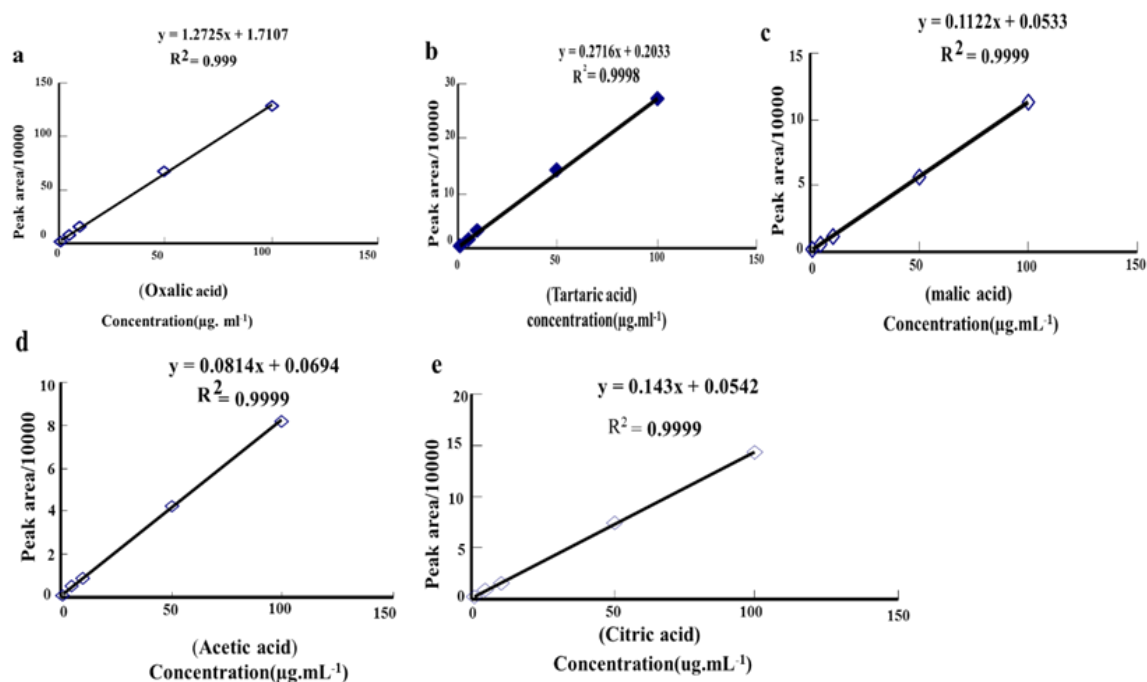

Figure S3. Standard curve for five kinds of low molecule weight organic acids: (a)Oxalic acid(b) Tartaric acid (c) Malic acid (d) Acetic acid (e) Citric acid

Table S2. Standard curve regression equation of different components: Y: The chromatograph peak area; y: absorbance; x: concentration ( $\mu\text{g}\cdot\text{mL}^{-1}$ )

| (Components)    | Regression equation    | Correlation coefficient ( $R^2$ ) |
|-----------------|------------------------|-----------------------------------|
| Tea ployphenols | $Y=6574.9x+2443.2$     | 0.9996                            |
| Theanine        | $Y=48429x+13234$       | 0.9999                            |
| Caffeine        | $Y=34629x-3763.2$      | 0.9999                            |
| Free amino acid | $y = 0.0452x + 0.1105$ | 0.9981                            |

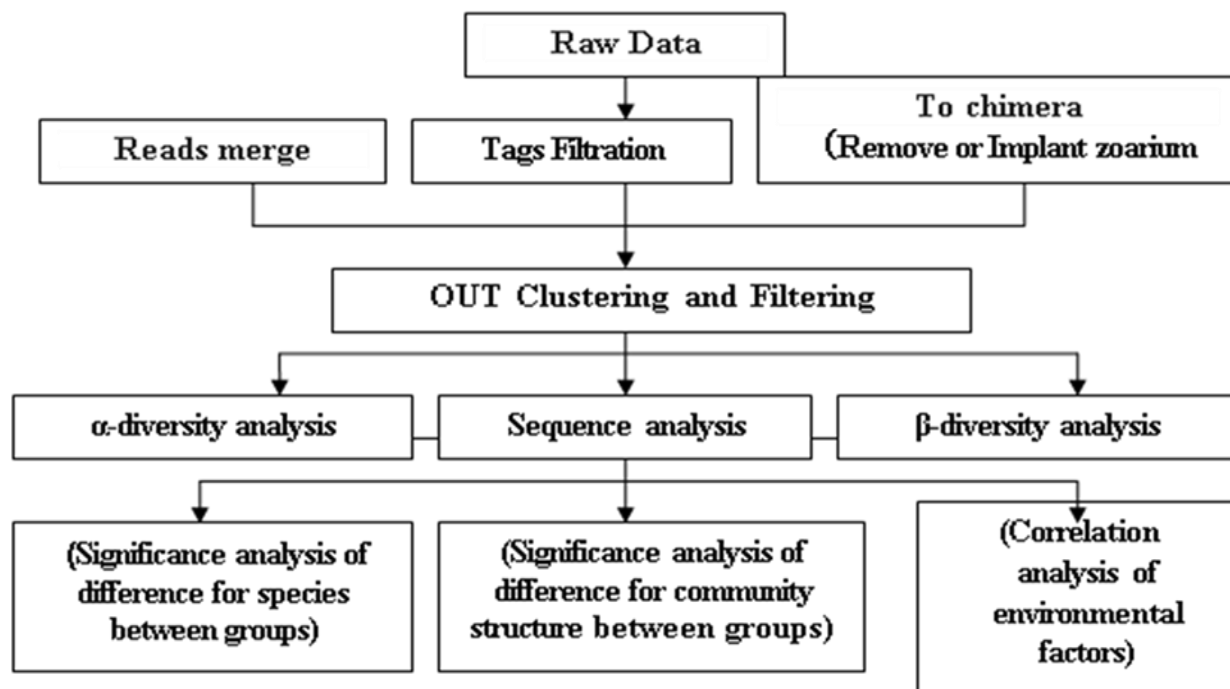

Figure S4. Sequencing Data Processing Analysis Flow
